# Supplementary material
Source: HighWire-hosted journal article supplement (https://erj.ersjournals.com/content/55/2/1901959)
Supplement: inline-supplementary-material-1 [file inline-supplementary-material-1.pdf]

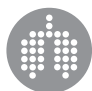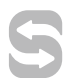

SHAREABLE PDF

# PET/CT features of extrapulmonary tuberculosis at first clinical presentation: a cross-sectional observational $^{18}\text{F}$ -FDG imaging study across six countries

Jamshed Bomanji<sup>1,14</sup>, Rajnish Sharma<sup>2,14</sup>, Bhagwant R. Mittal<sup>3,14</sup>, Sanjay Gambhir<sup>4,14</sup>, Ahmad Qureshy<sup>5,14</sup>, Shamim M.F. Begum<sup>6,14</sup>, Diana Paez<sup>7,14</sup>, Mike Sathekge<sup>8,14</sup>, Mariza Vorster<sup>8,14</sup>, Dragana Sobic Saranovic<sup>9,14</sup>, Pawana Pusuwan<sup>10,14</sup>, Vera Mann<sup>1,14</sup>, Sobhan Vinjamuri<sup>11,14</sup>, Alimuddin Zumla<sup>12,14</sup> and Thomas N.B. Pascual<sup>13,14</sup>, for the International Atomic Energy Agency Extra-pulmonary TB Consortium

**Affiliations:** <sup>1</sup>Institute of Nuclear Medicine, UCLH NHS Foundation Trust, London, UK. <sup>2</sup>Division of Nuclear Medicine and PET Imaging, Specialist in Nuclear Medicine and Thyroid Diseases, Molecular Imaging and Research Center (MIRC), INMAS, Delhi, India. <sup>3</sup>Dept of Nuclear Medicine and PET, Post Graduate Institute of Medical Education and Research, Chandigarh, India. <sup>4</sup>Dept of Nuclear Medicine, SGPGIMS, Lucknow, India. <sup>5</sup>Institute of Nuclear Medicine and Oncology (INMOL) Hospital, Lahore, Pakistan. <sup>6</sup>National Institute of Nuclear Medicine and Allied Sciences (NINMAS), BSM Medical University Campus, Shahbag, Bangladesh. <sup>7</sup>Nuclear Medicine and Diagnostic Imaging Section, Division of Human Health, IAEA, Vienna, Austria. <sup>8</sup>Dept of Nuclear Medicine, Steve Biko Academic Hospital, University of Pretoria, Pretoria, South Africa. <sup>9</sup>Faculty of Medicine University of Belgrade, Center of Nuclear Medicine Clinical Center of Serbia, Belgrade, Serbia. <sup>10</sup>Division of Nuclear Medicine, Faculty of Medicine, Siriraj Hospital, Mahidol University, Bangkok, Thailand. <sup>11</sup>Dept of Nuclear Medicine, Royal Liverpool University Hospital, Liverpool, UK. <sup>12</sup>Center for Clinical Microbiology, Division of Infection and Immunity, University College London, and the National Institute of Health Research Biomedical Research Centre at UCL Hospitals, London, UK. <sup>13</sup>Section of Nuclear Medicine and Diagnostic Imaging, Division of Human Health, Dept of Nuclear Sciences and Applications, International Atomic Energy Agency, Vienna International Centre, Vienna, Austria. <sup>14</sup>All authors contributed equally.

**Correspondence:** Jamshed Bomanji, Institute of Nuclear Medicine, 5th Floor, UCLH NHS Foundation Trust, 235 Euston Road, London NW1 2BU, UK. E-mail: jamshed.bomanji@nhs.net

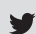

@ERSpublications

**$^{18}\text{F}$ -FDG PET/CT can localise EPTB disease sites not clinically detected. It may serve a useful tool for research studies defining pathogenetic mechanisms and cure, relapse and recurrence.** <http://bit.ly/2CKSH9a>

**Cite this article as:** Bomanji J, Sharma R, Mittal BR, *et al.* PET/CT features of extrapulmonary tuberculosis at first clinical presentation: a cross-sectional observational  $^{18}\text{F}$ -FDG imaging study across six countries. *Eur Respir J* 2020; 55: 1901959 [https://doi.org/10.1183/13993003.01959-2019].

This single-page version can be shared freely online.

## ABSTRACT

**Background:** A large proportion of the huge global burden of extrapulmonary tuberculosis (EPTB) cases are treated empirically without accurate definition of disease sites and extent of multi-organ disease involvement. Positron emission tomography (PET) imaging using 2-deoxy-2-(fluorine-18) fluoro-D-glucose ( $^{18}\text{F}$ -FDG) in tuberculosis could be a useful imaging technique for localising disease sites and extent of disease.

**Methods:** We conducted a study of HIV-negative adult patients with a new clinical diagnosis of EPTB across eight centres located in six countries: India, Pakistan, Thailand, South Africa, Serbia and

Bangladesh, to assess the extent of disease and common sites involved at first presentation.  $^{18}\text{F}$ -FDG PET/computed tomography (CT) scans were performed within 2 weeks of presentation.

**Findings:** 358 patients with EPTB (189 females; 169 males) were recruited over 45 months, with an age range of 18–83 years (females median 30 years; males median 38 years). 350 (98%) out of 358 patients (183 female, 167 male) had positive scans. 118 (33.7%) out of 350 had a single extrapulmonary site and 232 (66.3%) out of 350 had more than one site (organ) affected. Lymph nodes, skeleton, pleura and brain were common sites. 100 (28%) out of 358 EPTB patients had  $^{18}\text{F}$ -FDG PET/CT-positive sites in the lung. 110 patients were  $^{18}\text{F}$ -FDG PET/CT-positive in more body sites than were noted clinically at first presentation and 160 patients had the same number of positive body sites.

**Interpretation:**  $^{18}\text{F}$ -FDG PET/CT scan has potential for further elucidating the spectrum of disease, pathogenesis of EPTB and monitoring the effects of treatment on active lesions over time, and requires longitudinal cohort studies, twinned with biopsy and molecular studies.
